# Supplementary material for: F-actin architecture determines the conversion of chemical energy into mechanical work
Source: Springer Nature journal article supplement (doi:10.1038/s41467-024-47593-x), 2024-04-24
Supplement: 41467_2024_47593_MOESM3_ESM.pdf [file 41467_2024_47593_MOESM3_ESM.pdf]

**Supplementary Movie 1**

Time-lapse movie of actomyosin contraction and NADH fluorescence with myosin concentration of 12.5 nM, 25 nM, 50 nM, without myosin, and without actin and myosin. Actin concentration is 6  $\mu$ M. Actin (red), myosin (green), NADH (white) are imaged. Scale bar is 10  $\mu$ m.

**Supplementary Movie 2**

Time-lapse movie of actomyosin contraction and NADH fluorescence with myosin concentration of 12.5 nM, 25 nM, 50 nM. Actin concentration is 6  $\mu$ M. Actin (red), myosin (green), NADH (white) are imaged. Scale bar is 10  $\mu$ m.

**Supplementary Movie 3**

Time-lapse movie of actomyosin contraction and NADH fluorescence with 1 mM s-nitro-blebbistatin. Actin and myosin concentrations are 6  $\mu$ M and 50 nM, respectively. Actin (red), myosin (green), NADH (white) are imaged. Scale bar is 10  $\mu$ m.

**Supplementary Movie 4**

Time-lapse movie of actomyosin contraction and NADH fluorescence with 5 mM ATP, and 1 mM ATP. Actin and myosin concentrations are 6  $\mu$ M and 50 nM, respectively. Actin (red), myosin (green), NADH (white) are imaged. Scale bar is 10  $\mu$ m.

**Supplementary Movie 5**

Time-lapse movie of actomyosin contraction and NADH fluorescence with 1  $\mu$ M fascin, 1  $\mu$ M fimbrin, or 0.7  $\mu$ M  $\alpha$ -actinin. Actin and myosin concentration are 6  $\mu$ M and 50 nM, respectively. Actin (red), myosin (green), NADH (white) are imaged. Scale bar is 10  $\mu$ m.

**Supplementary Movie 6**

Time-lapse movie of actomyosin contraction and NADH fluorescence with 1  $\mu$ M fascin, 1  $\mu$ M fimbrin, or 0.7  $\mu$ M  $\alpha$ -actinin. Actin and myosin concentrations are 6  $\mu$ M and 50 nM, respectively. Actin (red), myosin (green), NADH (white) are imaged. Scale bar is 10  $\mu$ m.

**Supplementary Movie 7**

Time-lapse movie of actin and NADH fluorescence with 1  $\mu$ M fascin, 1  $\mu$ M fimbrin, or 0.7  $\mu$ M  $\alpha$ -actinin without myosin present. Actin concentration is 6  $\mu$ M. Actin (red) and NADH (white) are imaged. Scale bar is 10  $\mu$ m.

**Supplementary Movie 8**

Time-lapse movie of actomyosin contraction and NADH fluorescence with 300 nM Arp2/3, 300 nM mDia1, [Arp2/3]:[mDia1]=1:1, and [Arp2/3]:[mDia1]=1:0.1. Actin and myosin concentrations are 6  $\mu$ M and 50 nM, respectively. Profilin concentration is 3  $\mu$ M. Actin (red), myosin (green), NADH (white) are imaged. Scale bar is 10  $\mu$ m.

**Supplementary Movie 9**

Time-lapse movie of actomyosin contraction and NADH fluorescence with 300 nM Arp2/3, 300 nM mDia1, [Arp2/3]:[mDia1]=1:1, and [Arp2/3]:[mDia1]=1:0.1. Actin and myosin concentrations are 6  $\mu$ M and 50 nM, respectively. Profilin concentration is 3  $\mu$ M. Actin (red), myosin (green), NADH (white) are imaged. Scale bar is 10  $\mu$ m.

**Supplementary Movie 10**

Time-lapse movie of actomyosin contraction and NADH fluorescence with 60 nM Arp2/3, and 6 nM Arp2/3. Actin and myosin concentrations are 6  $\mu$ M and 50 nM, respectively. Actin (red), myosin (green), NADH (white) are imaged. Scale bar is 10  $\mu$ m.

**Supplementary Movie 11**

Time-lapse movie of actin and NADH fluorescence with 300 nM Arp2/3, and 300 nM mDia1 without myosin present. Actin concentration is 6  $\mu$ M. Profilin concentration is 3  $\mu$ M. Actin (red) and NADH (white) are imaged. Scale bar is 10  $\mu$ m.

**Supplementary Movie 12**

Time-lapse movie of actomyosin contraction and NADH fluorescence with 56 nM gelsolin, 0.4  $\mu$ M

cofilin. Actin and myosin concentrations are 6  $\mu\text{M}$  and 50 nM, respectively. Actin (red), myosin (green), NADH (white) are imaged. Scale bar is 10  $\mu\text{m}$ .

**Supplementary Movie 13**

Time-lapse movie of actomyosin contraction and NADH fluorescence with 17  $\mu\text{M}$  phalloidin. Actin and myosin concentrations are 6  $\mu\text{M}$  and 50 nM, respectively. Actin (red), myosin (green), NADH (white) are imaged. Scale bar is 10  $\mu\text{m}$ .
